# Supplementary material for: Dapagliflozin Utilization in Chronic Kidney Disease and Its Real-World Effectiveness Among Patients with Lower Levels of Albuminuria in the USA and Japan
Source: Springer Nature journal article supplement (doi:10.1007/s12325-023-02773-x), 2024-01-19
Supplement: MOESM1 [file 26642778]

## Supplementary Material

This appendix has been provided by the authors to give readers additional information about their work.

### **Dapagliflozin Utilization in Chronic Kidney Disease and its Real-World Effectiveness Among Patients with Lower Levels of Albuminuria in the US and Japan**

Navdeep Tangri<sup>1</sup> · Anjay Rastogi<sup>2</sup> · Cassandra Nekeman-Nan<sup>3</sup> · Lai San Hong<sup>4</sup> · Asuka Ozaki<sup>5</sup> · Stefan Franzén<sup>6</sup> · Tadashi Sofue<sup>7</sup>

<sup>1</sup>Department of Internal Medicine, University of Manitoba, Winnipeg, MB, Canada

<sup>2</sup>David Geffen School of Medicine at UCLA, Los Angeles, CA, US

<sup>3</sup>Epidemiology, Cardiovascular, Renal and Metabolism, BioPharmaceuticals Medical, AstraZeneca, Gothenburg, Sweden

<sup>4</sup>Redsen Limited, Bournemouth, UK

<sup>5</sup>Medical Affairs, AstraZeneca K. K., Osaka, Japan

<sup>6</sup>Medical & Payer Evidence Statistics, BioPharmaceuticals Medical, AstraZeneca, Gothenburg, Sweden

<sup>7</sup>Department of Cardiorenal and Cerebrovascular Medicine, Faculty of Medicine, Kagawa University, Miki, Japan

**Corresponding author:** Navdeep Tangri

Correspondence: Seven Oaks General Hospital, 2LB19-2300, McPhillips Street, Winnipeg, MB R2V 3M3, Canada

e-mail: ntangri@sogh.mb.ca

**Table of contents**

|                                                                                                                                                          |    |
|----------------------------------------------------------------------------------------------------------------------------------------------------------|----|
| <b>Supplementary statistics</b> .....                                                                                                                    | 3  |
| <b>Fig. S1</b> Patient flow diagram: dapagliflozin 10 mg prescription patterns since the CKD indication was approved in the US and Japan. ....           | 3  |
| <b>Fig. S2</b> Effectiveness analysis: quantile regression per decile among patient with UACR < 200 mg/g .....                                           | 5  |
| <b>Table S1</b> Descriptive analysis: eligibility criteria for dapagliflozin 10 mg utilization. ....                                                     | 6  |
| <b>Table S2</b> Descriptive analysis: baseline characteristics of dapagliflozin 10 mg initiators and dapagliflozin eligible but untreated patients. .... | 8  |
| <b>Table S3a</b> Effectiveness analysis: baseline characteristics of the unmatched cohort in the US.....                                                 | 11 |
| <b>Table S3b</b> Effectiveness analysis: baseline characteristics of the unmatched cohort in Japan.....                                                  | 14 |
| <b>Table S4</b> Effectiveness analysis: complete baseline characteristics of the propensity score matched cohort (US and Japan combined).....            | 17 |
| <b>Table S5</b> List of ICD-10 diagnosis codes used to define CKD.....                                                                                   | 20 |

**Supplementary statistics: Bayesian dynamic borrowing**

Bayesian dynamic borrowing was used to investigate how results from the total cohort of patients with UACR < 200 mg/g could be used as an informative prior distribution for the results in the subgroup of patients without type 2 diabetes. This analysis used a mixture prior, where the informative prior from the total cohort was mixed with a weak prior representing minimal knowledge of what the true effect in patients without type 2 diabetes might be. The informative prior was a normal distribution with mean and standard deviation corresponding to the point estimate and confidence interval for the total cohort ( $\mu = 1.07$  and  $\sigma = 0.32$ ). The weak prior was set as normal with  $\mu = 0$  and  $\sigma = 24$  where the expected value reflects no effect of dapagliflozin and the standard deviation is set to reflect the standard error in the informative prior, but with one observation.

A tipping point analysis was performed, revealing that a weight of 0.3 on the informative prior was enough to result in a treatment effect with dapagliflozin initiation that had a 95% credibility interval not including 0.

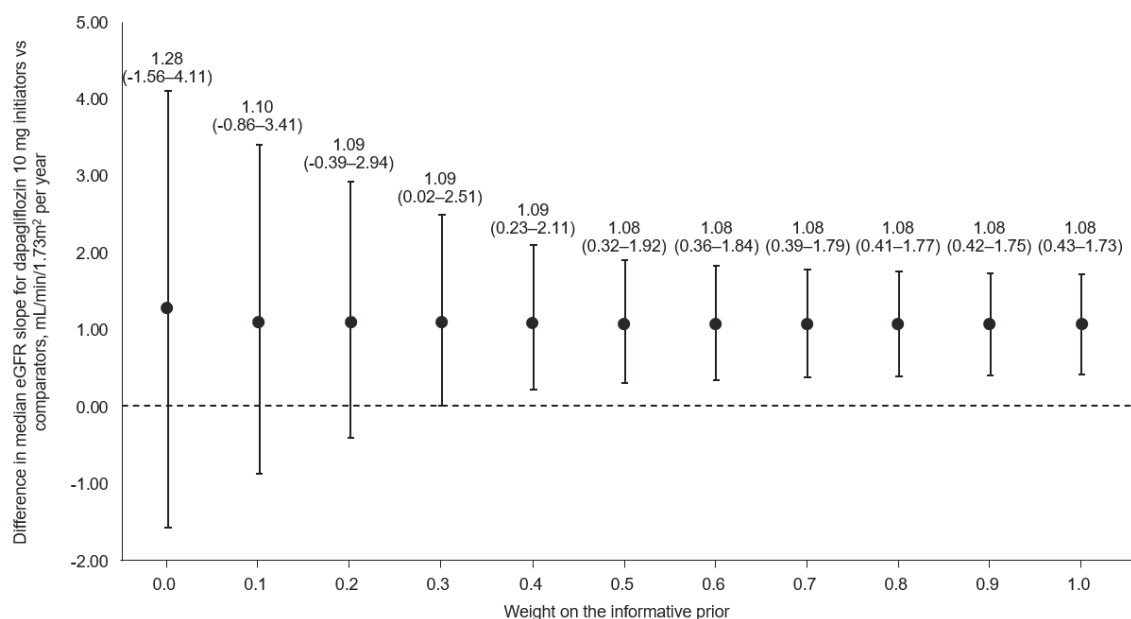

**Figure.** Bayesian dynamic borrowing tipping point analysis with weights on the informative prior from 0 to 1.

**Fig. S1 Patient flow diagram: dapagliflozin 10 mg prescription patterns since the CKD indication was approved in the US and Japan.**

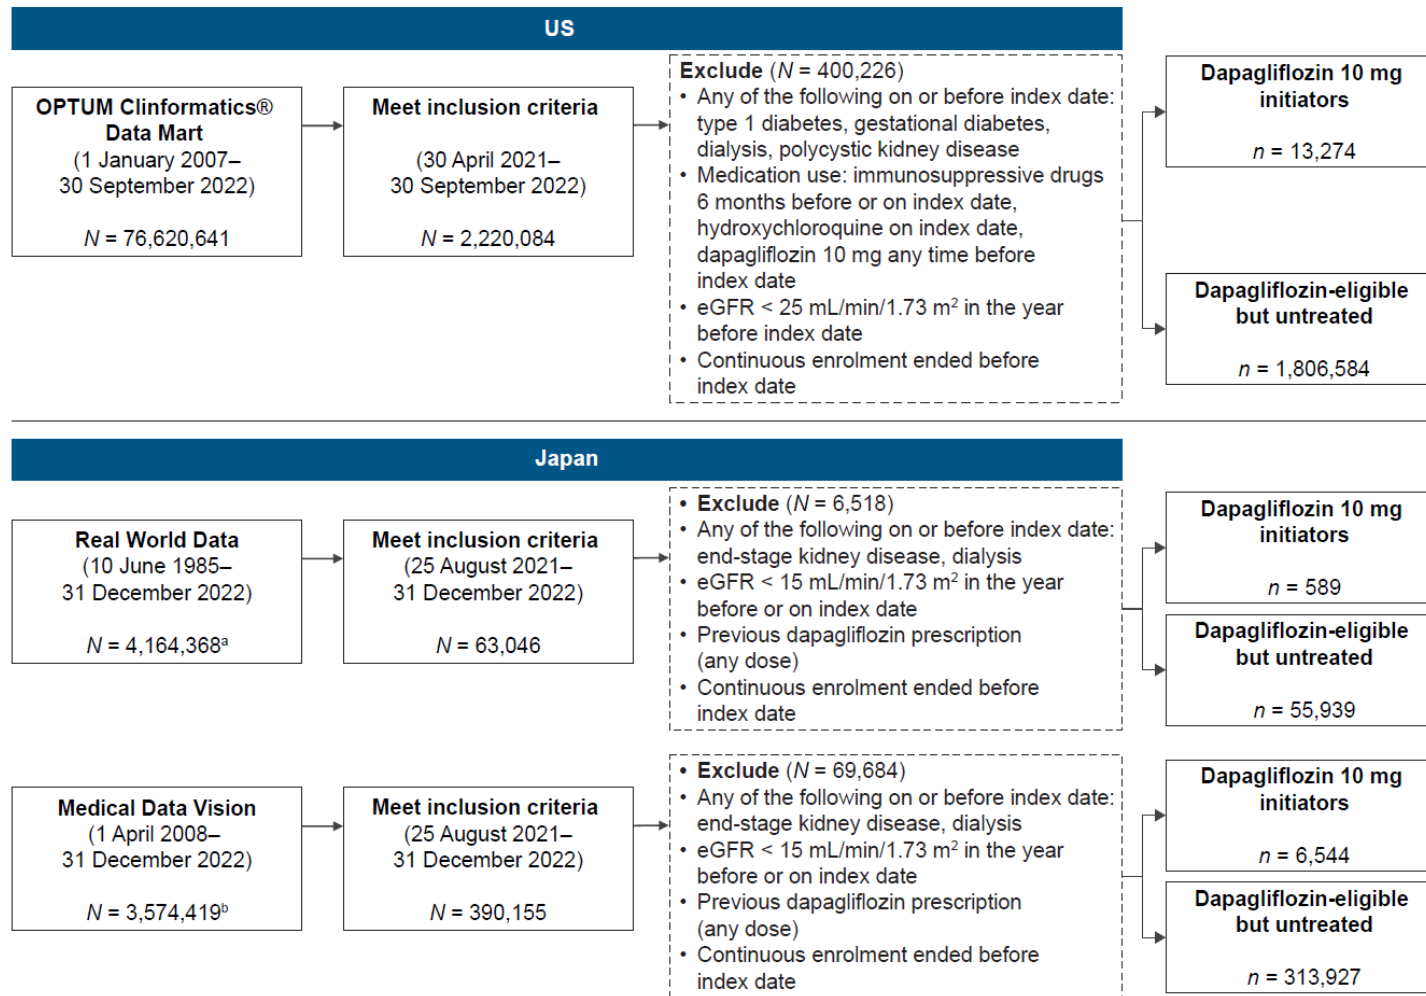

<sup>a</sup>Included only patients with at least one eGFR of < 90 mL/min/1.73m<sup>2</sup> ever

<sup>b</sup>Included only patients with at least one eGFR of < 90 mL/min/1.73m<sup>2</sup> or a CKD diagnosis code ever  
CKD chronic kidney disease, eGFR estimated glomerular filtration rate

**Fig. S2** Effectiveness analysis: quantile regression per decile among patient with UACR < 200 mg/g

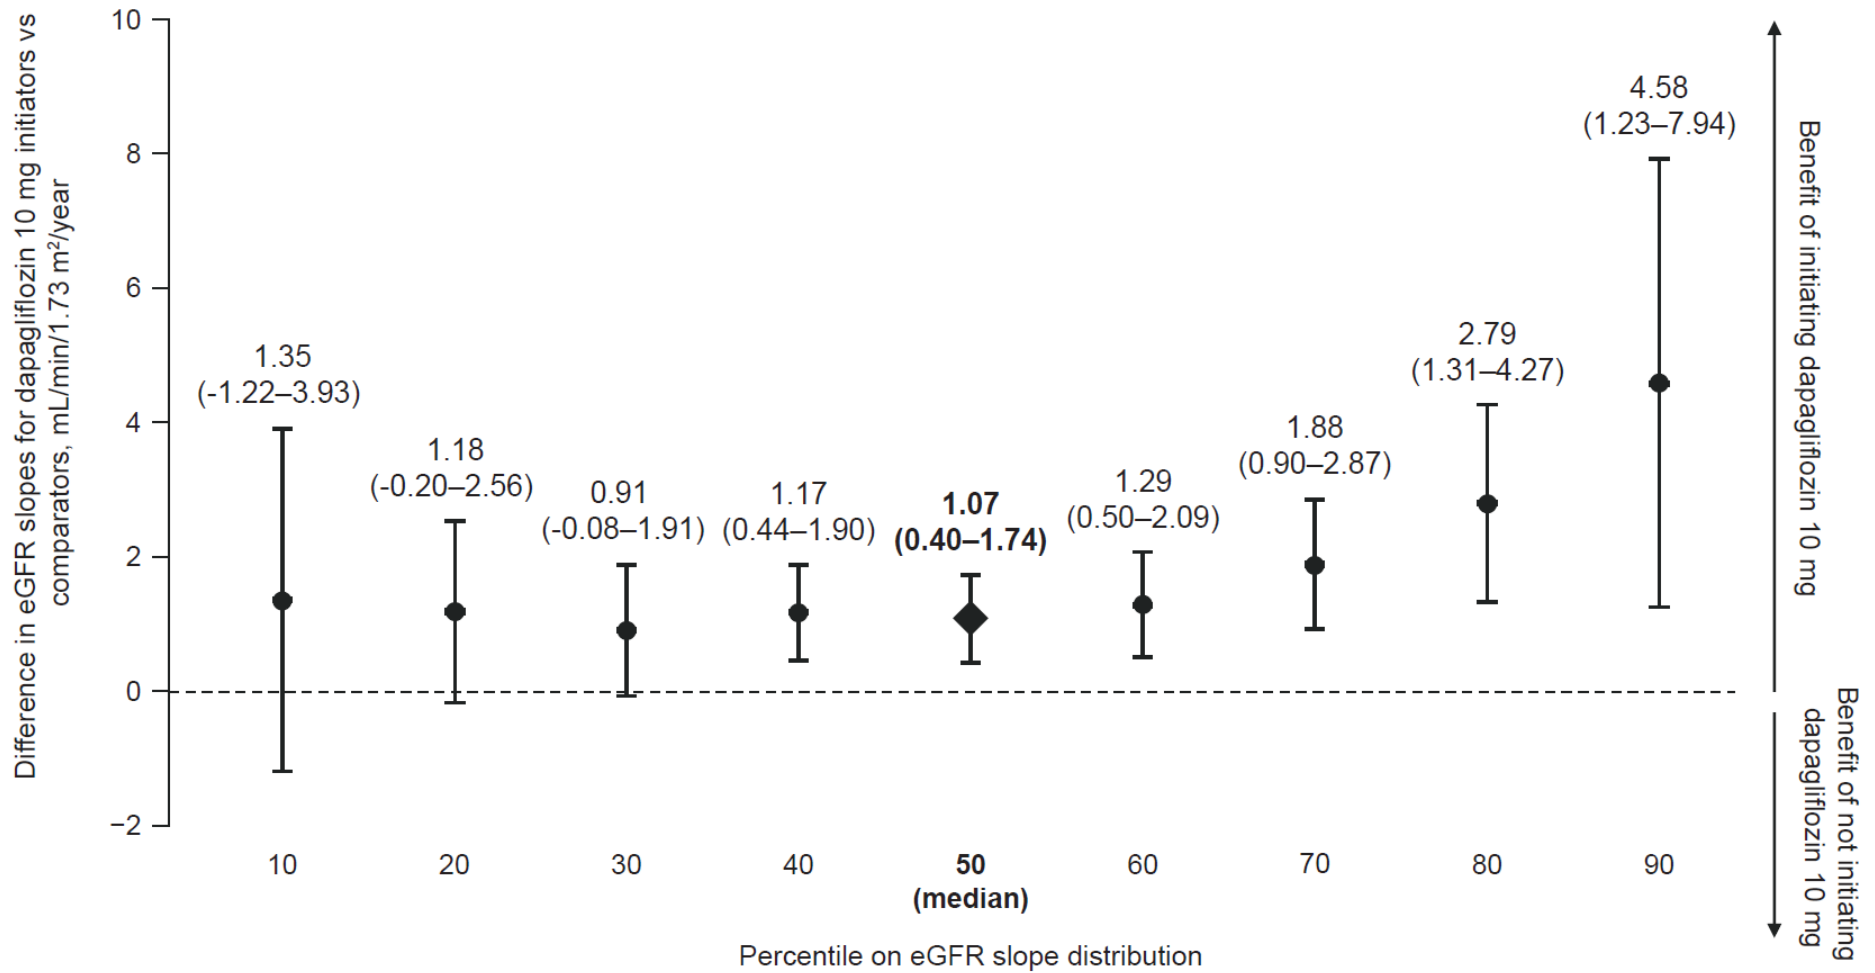

*eGFR* estimated glomerular filtration rate, *UACR* urinary albumin-to-creatinine ratio

**Table S1** Descriptive analysis: eligibility criteria for dapagliflozin 10 mg utilization.

|                                                                    | US (Optum Clinformatics®<br>Data Mart)                                                                                                                                                                    | Japan (Real World Data Co.<br>Ltd)                                                                                                                                                                        | Japan (Medical Data Vision Co.<br>Ltd)                                                                                                                                           |
|--------------------------------------------------------------------|-----------------------------------------------------------------------------------------------------------------------------------------------------------------------------------------------------------|-----------------------------------------------------------------------------------------------------------------------------------------------------------------------------------------------------------|----------------------------------------------------------------------------------------------------------------------------------------------------------------------------------|
| <b>Inclusion criteria</b>                                          |                                                                                                                                                                                                           |                                                                                                                                                                                                           |                                                                                                                                                                                  |
| Age ≥ 18 years                                                     | X                                                                                                                                                                                                         | X                                                                                                                                                                                                         | X                                                                                                                                                                                |
| CKD definition (any of the criteria)                               | <ul style="list-style-type: none"> <li>•UACR ≥ 30 mg/g</li> <li>•CKD diagnosis code<sup>a</sup></li> <li>•Two eGFR measurements at least 90 days apart, both &lt; 60 mL/min/1.73 m<sup>2</sup></li> </ul> | <ul style="list-style-type: none"> <li>•UACR ≥ 30 mg/g</li> <li>•CKD diagnosis code<sup>a</sup></li> <li>•Two eGFR measurements at least 90 days apart, both &lt; 60 mL/min/1.73 m<sup>2</sup></li> </ul> | <ul style="list-style-type: none"> <li>•CKD diagnosis code<sup>a</sup></li> <li>•Two eGFR measurements at least 90 days apart, both &lt; 60 mL/min/1.73 m<sup>2</sup></li> </ul> |
| ≥ 365 days of continuous enrolment before index date               | X                                                                                                                                                                                                         | X                                                                                                                                                                                                         | X                                                                                                                                                                                |
| <b>Exclusion criteria</b>                                          |                                                                                                                                                                                                           |                                                                                                                                                                                                           |                                                                                                                                                                                  |
| Diagnosed with type 1 diabetes on or before index date             | X                                                                                                                                                                                                         |                                                                                                                                                                                                           |                                                                                                                                                                                  |
| Diagnosis of gestational diabetes mellitus on or before index date | X                                                                                                                                                                                                         |                                                                                                                                                                                                           |                                                                                                                                                                                  |
| Dialysis on or before index date                                   | X                                                                                                                                                                                                         | X                                                                                                                                                                                                         | X                                                                                                                                                                                |
| Dapagliflozin 10 mg any time before index date                     | X                                                                                                                                                                                                         | X                                                                                                                                                                                                         | X                                                                                                                                                                                |
| Diagnosis or procedure indicative of end-stage kidney disease      |                                                                                                                                                                                                           | X                                                                                                                                                                                                         | X                                                                                                                                                                                |
| Polycystic kidney disease on or before index date                  | X                                                                                                                                                                                                         |                                                                                                                                                                                                           |                                                                                                                                                                                  |
| Use of immunosuppressive drugs 6 months before or on index date    | X                                                                                                                                                                                                         |                                                                                                                                                                                                           |                                                                                                                                                                                  |
| Use of hydroxychloroquine on index date                            | X                                                                                                                                                                                                         |                                                                                                                                                                                                           |                                                                                                                                                                                  |
| Not within eGFR range on or in year before index date              | < 25 mL/min/1.73 m <sup>2</sup>                                                                                                                                                                           | < 15 mL/min/1.73 m <sup>2</sup>                                                                                                                                                                           | < 15 mL/min/1.73 m <sup>2</sup>                                                                                                                                                  |

An X indicates that the criterion was applied in the database of interest

<sup>a</sup>Full code list is available in Table S5

15 November 2023

*CKD* chronic kidney disease, *eGFR* estimated glomerular filtration rate, *SGLT-2i* sodium-glucose cotransporter-2 inhibitor, *UACR* urinary albumin-to-creatinine ratio, *UPCR* urinary protein-to-creatinine ratio

**Table S2** Descriptive analysis: baseline characteristics of dapagliflozin 10 mg initiators and dapagliflozin eligible but untreated patients.

|                                         | Dapagliflozin 10 mg initiators |             |             | Dapagliflozin eligible but untreated patients |             |              |
|-----------------------------------------|--------------------------------|-------------|-------------|-----------------------------------------------|-------------|--------------|
|                                         | US                             | Japan (RWD) | Japan (MDV) | US                                            | Japan (RWD) | Japan (MDV)  |
| Number of patients                      | 13,274                         | 589         | 6,544       | 1,806,584                                     | 55,939      | 313,927      |
| Female, n (%)                           | 5,810 (44)                     | 192 (33)    | 2,114 (32)  | 952,895 (53)                                  | 25,926 (46) | 130,182 (42) |
| Age, median, years (IQR)                | 73 (69-79)                     | 77 (68-83)  | 71 (58-79)  | 75 (68-82)                                    | 80 (72-86)  | 78 (70-85)   |
| Race, n (%)                             |                                | n/a         | n/a         |                                               | n/a         | n/a          |
| Asian                                   | 602 (4)                        |             |             | 58,159 (3)                                    |             |              |
| Black                                   | 2,384 (18)                     |             |             | 218,957 (12)                                  |             |              |
| Hispanic                                | 2,032 (15)                     |             |             | 205,725 (11)                                  |             |              |
| White                                   | 7,282 (55)                     |             |             | 1,205,184 (67)                                |             |              |
| Other/unknown                           | 974 (7)                        |             |             | 118,559 (7)                                   |             |              |
| Insurance type, n (%)                   |                                | n/a         | n/a         |                                               | n/a         | n/a          |
| Commercial                              | 349 (3)                        |             |             | 252,635 (14)                                  |             |              |
| Medicare                                | 12,925 (97)                    |             |             | 1,553,949 (86)                                |             |              |
| BMI available, n (%)                    | 4,505 (34)                     | 211 (36)    | 2,403 (37)  | 350,647 (19)                                  | 21,397 (38) | 173,215 (55) |
| BMI, kg/m <sup>2</sup> , mean (SD)      | 31.8 (7.0)                     | 23.4 (3.6)  | 24.5 (4.8)  | 29.7 (6.7)                                    | 23.0 (4.3)  | 22.8 (4.3)   |
| BMI category, kg/m <sup>2</sup> , n (%) |                                |             |             |                                               |             |              |
| 0–18.4                                  | 27 (1)                         | 15 (7)      | 154 (6)     | 5,793 (2)                                     | 2,846 (13)  | 25,969 (15)  |
| 18.5–24.9                               | 648 (14)                       | 130 (62)    | 1,318 (55)  | 77,938 (22)                                   | 12,592 (59) | 102,046 (59) |
| 25.0–29.9                               | 1,310 (29)                     | 57 (27)     | 660 (28)    | 119,239 (34)                                  | 4,787 (22)  | 35,664 (21)  |
| ≥30                                     | 2,520 (56)                     | 9 (4)       | 271 (11)    | 147,677 (42)                                  | 1,172 (6)   | 9,536 (5)    |
| Comorbidities, n (%)                    |                                |             |             |                                               |             |              |
| Atrial fibrillation                     | 3,895 (30)                     | 252 (43)    | 1,359 (21)  | 367,032 (20)                                  | 11,376 (20) | 53,021 (17)  |
| Hypertension                            | 12,950 (98)                    | 540 (92)    | 5,657 (86)  | 1,582,315 (88)                                | 40,698 (73) | 205,156 (65) |
| Heart failure                           | 6,258 (47)                     | 417 (71)    | 2,944 (45)  | 427,195 (24)                                  | 23,613 (42) | 119,123 (38) |
| Myocardial infarction                   | 2,021 (15)                     | 85 (14)     | 278 (4)     | 137,057 (8)                                   | 3,988 (7)   | 12,045 (4)   |
| Stroke                                  | 3,954 (30)                     | 179 (30)    | 897 (14)    | 443,701 (25)                                  | 17,960 (32) | 49,943 (16)  |
| Other cardiovascular disease            | 9,897 (75)                     | 356 (60)    | 2,127 (33)  | 1,096,498 (61)                                | 22,764 (41) | 91,828 (29)  |



|                                                   |                   |                |             |                 |                 |              |
|---------------------------------------------------|-------------------|----------------|-------------|-----------------|-----------------|--------------|
| Type 2 diabetes                                   | 11,290 (85)       | 232 (39)       | 2,384 (36)  | 887,419 (49)    | 17,706 (32)     | 104,275 (33) |
| Medications, n (%)                                |                   |                |             |                 |                 |              |
| SGLT2-is (excl. dapagliflozin 10 mg)              | 884 (7)           | 17 (3)         | 198 (3)     | 57,053 (3)      | 1,404 (3)       | 7,789 (2)    |
| RASis                                             | 10,709 (81)       | 373 (63)       | 3,487 (53)  | 940,504 (52)    | 14,838 (27)     | 60,147 (19)  |
| ACEis                                             | 4,883 (37)        | 85 (14)        | 555 (8)     | 496,067 (27)    | 2,436 (4)       | 9,350 (3)    |
| ARBs                                              | 5,298 (40)        | 306 (52)       | 2,950 (45)  | 453,052 (25)    | 12,811 (23)     | 51,389 (16)  |
| Cardiovascular medications (any)                  | 12,786 (96)       | 485 (82)       | 4,132 (63)  | 1,314,304 (73)  | 25,245 (45)     | 101,524 (32) |
| Statins                                           | 11,006 (83)       | 259 (44)       | 2,145 (33)  | 985,372 (55)    | 11,628 (21)     | 42,969 (14)  |
| $\beta$ -blockers                                 | 8,386 (63)        | 300 (51)       | 1,614 (25)  | 657,822 (36)    | 8,788 (16)      | 35,004 (11)  |
| Loop diuretics                                    | 5,304 (40)        | 264 (45)       | 1,531 (23)  | 284,392 (16)    | 8,327 (15)      | 39,704 (13)  |
| Calcium channel blockers                          | 5,658 (43)        | 204 (35)       | 2,209 (34)  | 544,284 (30)    | 13,711 (25)     | 56,750 (18)  |
| Antiplatelets/anticoagulants                      | 2,710 (20)        | 183 (31)       | 1,216 (19)  | 187,689 (10)    | 8,551 (15)      | 33,374 (11)  |
| Glucose-lowering medications (any)                | 9,313 (70)        | 104 (18)       | 876 (14)    | 501,277 (28)    | 8,572 (15)      | 35,464 (11)  |
| Metformin                                         | 5,967 (45)        | 29 (5)         | 268 (4)     | 364,262 (20)    | 3,429 (6)       | 11,458 (4)   |
| Insulin                                           | 3,296 (25)        | 30 (5)         | 222 (3)     | 134,375 (7)     | 2,239 (4)       | 11,156 (4)   |
| Sulfonylureas                                     | 3,597 (27)        | 10 (2)         | 107 (2)     | 164,224 (9)     | 1,653 (3)       | 5,491 (2)    |
| GLP-1RAs                                          | 1,767 (13)        | 10 (2)         | 104 (2)     | 69,366 (4)      | 728 (1)         | 4,098 (1)    |
| DPP-4 inhibitors                                  | 1,845 (14)        | 77 (13)        | 604 (9)     | 69,729 (4)      | 5,628 (10)      | 23,992 (8)   |
| Glitazones                                        | 1,033 (8)         | 4 (1)          | 29 (< 1)    | 41,225 (2)      | 427 (1)         | 1,460 (< 1)  |
| eGFR available, n (%)                             | 9,528 (72)        | 588 (100)      | 1,585 (24)  | 1,111,605 (62)  | 55,325 (99)     | 101,287 (32) |
| eGFR, mean, mL/min/1.73 m <sup>2</sup> (SD)       | 54.6 (18.6)       | 48.9 (18.9)    | 48.4 (19.4) | 62.7 (19.7)     | 56.0 (21.5)     | 53.6 (21.3)  |
| eGFR category, mL/min/1.73 m <sup>2</sup> , n (%) |                   |                |             |                 |                 |              |
| $\geq 60$                                         | 2,984 (31)        | 110 (19)       | 342 (22)    | 498,823 (45)    | 12,104 (22)     | 20,397 (20)  |
| 45–59                                             | 3,205 (34)        | 222 (38)       | 495 (31)    | 420,008 (38)    | 27,559 (50)     | 47,661 (47)  |
| 30–44                                             | 2,891 (30)        | 177 (30)       | 480 (30)    | 168,369 (15)    | 11,063 (20)     | 21,506 (21)  |
| 15–29 <sup>a</sup>                                | 448 (5)           | 79 (13)        | 268 (17)    | 24,227 (2)      | 4,592 (8)       | 11,695 (12)  |
| UACR available, n (%)                             | 6,079 (46)        | 245 (42)       | n/a         | 476,118 (26)    | 14,007 (25)     | n/a          |
| UACR, mg/g, median (IQR)                          | 45.0 (11.8-202.9) | 2.3 (1.5-20.2) |             | 25.9 (7.9-72.0) | 32.8 (2.8-81.8) |              |
| UACR category, mg/g, n (%)                        |                   |                |             |                 |                 |              |

15 November 2023

|        |            |          |              |             |
|--------|------------|----------|--------------|-------------|
| 0–29   | 2,512 (41) | 194 (79) | 250,221 (53) | 6,202 (44)  |
| 30–299 | 2,341 (39) | 28 (11)  | 184,742 (39) | 6,167 (44)  |
| ≥ 300  | 1,226 (20) | 23 (9)   | 41,148 (9)   | 1,638 (12)  |
| < 200  | 4,542 (75) | 219 (89) | 419,370 (88) | 12,031 (86) |

<sup>a</sup>US lower eGFR threshold was 25 mL/min/1.73m<sup>2</sup>

*ACEi* angiotensin-converting enzyme inhibitor, *ARB* angiotensin-receptor blocker, *BMI* body mass index, *eGFR* estimated glomerular filtration rate, *DPP-4* dipeptidyl peptidase-4, *GLP-1 RA* glucagon-like peptide-receptor 1 agonist, *IQR*, interquartile range, *MDV* Medical Data Vision, *n/a* not applicable, *RASi* renin-angiotensin system inhibitor, *RWD* Real World Data, *SD* standard deviation, *SGLT-2i* sodium-glucose cotransporter-2 inhibitor, *UACR* urinary albumin-to-creatinine ratio

**Table S3a** Effectiveness analysis: baseline characteristics of the unmatched cohort in the US.

|                                         | UACR < 200 mg/g                  |                                         | UACR < 200 mg/g AND no type 2 diabetes |                                         |
|-----------------------------------------|----------------------------------|-----------------------------------------|----------------------------------------|-----------------------------------------|
|                                         | Initiated dapagliflozin<br>10 mg | Did not initiate dapagliflozin<br>10 mg | Initiated dapagliflozin<br>10 mg       | Did not initiate dapagliflozin<br>10 mg |
| Number of patients                      | 2,776                            | 12,967                                  | 190                                    | 919                                     |
| Female, n (%)                           | 1,234 (44)                       | 5,795 (45)                              | 81 (43)                                | 395 (43)                                |
| Age, years, median (IQR)                | 74 (70-79)                       | 74 (70-79)                              | 77 (72-82)                             | 77 (72-82)                              |
| Race, n (%)                             |                                  |                                         |                                        |                                         |
| Asian                                   | 152 (5)                          | 687 (5)                                 | 5 (3)                                  | 20 (2)                                  |
| Black                                   | 410 (15)                         | 1,631 (13)                              | 30 (16)                                | 107 (12)                                |
| Hispanic                                | 640 (23)                         | 3,093 (24)                              | 34 (18)                                | 198 (22)                                |
| White                                   | 1,426 (51)                       | 6,897 (53)                              | 112 (59)                               | 549 (60)                                |
| Other/unknown                           | 148 (5)                          | 659 (5)                                 | 9 (5)                                  | 45 (5)                                  |
| Insurance type, n (%)                   |                                  |                                         |                                        |                                         |
| Commercial                              | 103 (4)                          | 978 (8)                                 | 6 (3)                                  | 62 (7)                                  |
| Medicare                                | 2,673 (96)                       | 11,989 (92)                             | 184 (97)                               | 857 (93)                                |
| BMI available, n (%)                    | 1,014 (37)                       | 3,773 (29)                              | 70 (37)                                | 315 (34)                                |
| BMI, kg/m <sup>2</sup> , mean (SD)      | 32.0 (6.9)                       | 31.3 (6.8)                              | 28.7 (5.6)                             | 28.2 (6.0)                              |
| BMI category, kg/m <sup>2</sup> , n (%) |                                  |                                         |                                        |                                         |
| 0–18.4                                  | < 5 <sup>a</sup>                 | 33 (1)                                  | < 5 <sup>a</sup>                       | 7 (2)                                   |
| 18.5–24.9                               | 143 (14)                         | 562 (15)                                | 13 (19)                                | 79 (25)                                 |
| 25.0–29.9                               | 298 (30)                         | 1,182 (31)                              | 35 (50)                                | 136 (43)                                |
| ≥ 30                                    | 572 (56)                         | 1,996 (53)                              | 21 (30)                                | 93 (30)                                 |
| CKD aetiology, n (%)                    |                                  |                                         |                                        |                                         |
| Diabetic                                | 1,805 (65)                       | 8,340 (64)                              | n/a                                    | n/a                                     |
| Hypertensive                            | 1,559 (56)                       | 6,704 (52)                              | 139 (73)                               | 533 (60)                                |
| Glomerular disease                      | 744 (27)                         | 3,121 (24)                              | 37 (19)                                | 200 (22)                                |
| Renal tubulo-interstitial disease       | 436 (16)                         | 2,176 (17)                              | 42 (22)                                | 162 (18)                                |
| Comorbidities, n (%)                    |                                  |                                         |                                        |                                         |

|                                                   |                  |                  |                  |                  |
|---------------------------------------------------|------------------|------------------|------------------|------------------|
| Angina pectoris                                   | 544 (20)         | 2,216 (17)       | 40 (21)          | 165 (18)         |
| Atrial fibrillation                               | 734 (26)         | 2,914 (22)       | 81 (43)          | 257 (28)         |
| Bradycardia                                       | 437 (16)         | 2,063 (16)       | 48 (25)          | 198 (22)         |
| Heart failure                                     | 1,167 (42)       | 5,281 (41)       | 112 (59)         | 530 (58)         |
| Hypertension                                      | 2,715 (98)       | 12,654 (98)      | 186 (98)         | 882 (96)         |
| Myocardial infarction                             | 369 (13)         | 1,209 (9)        | 23 (12)          | 91 (10)          |
| Stroke                                            | 877 (32)         | 3,923 (30)       | 56 (29)          | 298 (32)         |
| Other cardiovascular disease                      | 2,030 (73)       | 9,101 (70)       | 157 (83)         | 722 (79)         |
| Anaemia                                           | 1,531 (55)       | 6,675 (51)       | 106 (56)         | 506 (55)         |
| Hyperkalaemia                                     | 533 (19)         | 1,978 (15)       | 41 (22)          | 137 (15)         |
| Type 2 diabetes                                   | 2,572 (93)       | 12,004 (93)      | n/a              | n/a              |
| Medications, n (%)                                |                  |                  |                  |                  |
| RASis                                             | 2,391 (86)       | 11,176 (86)      | 160 (84)         | 790 (86)         |
| ARNIs                                             | 305 (11)         | 307 (2)          | 41 (22)          | 28 (3)           |
| β-blockers                                        | 1,685 (61)       | 6,823 (53)       | 145 (76)         | 506 (55)         |
| Calcium channel blockers                          | 1,190 (43)       | 5,604 (43)       | 94 (49)          | 396 (43)         |
| Diuretics                                         | 1,431 (52)       | 5,355 (41)       | 131 (69)         | 415 (45)         |
| Antithrombotic agents                             | 561 (20)         | 2,194 (17)       | 38 (20)          | 153 (17)         |
| Statins                                           | 2,447 (88)       | 11,010 (85)      | 140 (74)         | 630 (69)         |
| Antihyperkalaemic treatments                      | 42 (2)           | 89 (< 1)         | < 5 <sup>a</sup> | 5 (< 1)          |
| Antidiabetic treatments                           | 2,286 (82)       | 10,078 (78)      | n/a              | n/a              |
| Other medications <sup>b</sup>                    | 1,441 (52)       | 6,538 (50)       | 103 (54)         | 482 (52)         |
| eGFR available, n (%)                             | 2,756 (99)       | 12,793 (99)      | 190 (100)        | 910 (99)         |
| eGFR, mL/min/1.73 m <sup>2</sup> , mean (SD)      | 57.7 (19.3)      | 64.0 (19.3)      | 50.3 (14.7)      | 60.4 (18.5)      |
| eGFR, mL/min/1.73 m <sup>2</sup> , median (IQR)   | 53.5 (42.8-70.7) | 61.8 (49.3-78.7) | 48.0 (40.4-57.6) | 58.4 (47.0-72.4) |
| eGFR category, mL/min/1.73 m <sup>2</sup> , n (%) |                  |                  |                  |                  |
| ≥ 60                                              | 1,060 (38)       | 6,815 (53)       | 37 (19)          | 421 (46)         |
| 45–59                                             | 874 (32)         | 3,702 (29)       | 77 (41)          | 292 (32)         |

15 November 2023

|                                                      |                 |                 |                 |                 |
|------------------------------------------------------|-----------------|-----------------|-----------------|-----------------|
| 30–44                                                | 747 (27)        | 2,055 (16)      | 70 (37)         | 170 (19)        |
| 15–29                                                | 75 (3)          | 221 (2)         | 6 (3)           | 27 (3)          |
| UACR available, n (%)                                | 2,774 (100)     | 12,952 (100)    | 190 (100)       | 919 (100)       |
| UACR, mg/g, mean (SD)                                | 40.0 (45.3)     | 34.8 (53.7)     | 30.4 (40.7)     | 29.9 (42.2)     |
| UACR, mg/g, median (IQR)                             | 21.3 (7.0-56.2) | 18.0 (6.9-46.0) | 14.0 (5.0-37.9) | 15.0 (5.0-37.6) |
| UACR category, mg/g, n (%)                           |                 |                 |                 |                 |
| 0–29                                                 | 1,598 (58)      | 8,155 (63)      | 131 (69)        | 624 (68)        |
| 30–200                                               | 1,178 (42)      | 4,812 (37)      | 59 (31)         | 295 (32)        |
| With UACR/UPCR measure and no type 2 diabetes, n (%) |                 |                 |                 |                 |
| UACR                                                 | 190 (7)         | 919 (7)         | 190 (100)       | 919 (100)       |
| UPCR                                                 | 93 (12)         | 333 (13)        | 93 (48)         | 313 (34)        |
| Healthcare provider, n (%)                           |                 |                 |                 |                 |
| Primary care                                         | 1,693 (61)      | 8,809 (68)      | 94 (49)         | 551 (60)        |
| Other                                                | 1,083 (39)      | 4,158 (32)      | 96 (51)         | 368 (40)        |

<sup>a</sup>Exact n numbers for US cohorts with n < 5 not shown in accordance with Clinformatics Data Mart patient privacy guidelines.

<sup>b</sup>Calcium, magnesium, nonsteroidal anti-inflammatory drugs, systemic corticosteroids or vitamin D

*ARNI* angiotensin-receptor neprilysin inhibitor, *BMI* body mass index, *CKD* chronic kidney disease, *eGFR* estimated glomerular filtration rate, *IQR* interquartile range, *n/a* not applicable, *RASi* renin-angiotensin system inhibitor, *SD* standard deviation, *UACR* urinary albumin-creatinine ratio, *UPCR* urinary protein-creatinine ratio

**Table S3b** Effectiveness analysis: baseline characteristics of the unmatched cohort in Japan.

|                                         | UACR < 200 mg/g                  |                                         | UACR < 200 mg/g AND no type 2 diabetes |                                         |
|-----------------------------------------|----------------------------------|-----------------------------------------|----------------------------------------|-----------------------------------------|
|                                         | Initiated dapagliflozin<br>10 mg | Did not initiate dapagliflozin<br>10 mg | Initiated dapagliflozin<br>10 mg       | Did not initiate dapagliflozin<br>10 mg |
| Number of patients                      | 253                              | 846                                     | 110                                    | 365                                     |
| Female, n (%)                           | 83 (33)                          | 279 (33)                                | 35 (32)                                | 125 (34)                                |
| Age, years, median (IQR)                | 72 (60-79)                       | 74 (65-80)                              | 70 (55-78)                             | 71 (63-80)                              |
| BMI available, n (%)                    | 80 (32)                          | 280 (33)                                | 23 (21)                                | 113 (31)                                |
| BMI, kg/m <sup>2</sup> , mean (SD)      | 25.2 (5.1)                       | 23.8 (4.1)                              | 22.6 (3.3)                             | 23.1 (3.8)                              |
| BMI category, kg/m <sup>2</sup> , n (%) |                                  |                                         |                                        |                                         |
| 0–18.4                                  | 3 (4)                            | 23 (8)                                  | 2 (9)                                  | 9 (8)                                   |
| 18.5–24.9                               | 42 (53)                          | 154 (55)                                | 17 (74)                                | 72 (64)                                 |
| 25.0–29.9                               | 24 (30)                          | 86 (31)                                 | 3 (13)                                 | 29 (26)                                 |
| ≥ 30                                    | 11 (14)                          | 17 (6)                                  | 1 (4)                                  | 3 (2)                                   |
| CKD aetiology, n (%)                    |                                  |                                         |                                        |                                         |
| Diabetic                                | 13 (5)                           | 35 (4)                                  | n/a                                    | n/a                                     |
| Hypertensive                            | 0                                | 7 (< 1)                                 | 0                                      | 5 (1)                                   |
| Glomerular disease                      | 90 (36)                          | 204 (24)                                | 52 (47)                                | 131 (36)                                |
| Renal tubulo-interstitial disease       | 21 (8)                           | 119 (14)                                | 8 (7)                                  | 74 (20)                                 |
| Comorbidities, n (%)                    |                                  |                                         |                                        |                                         |
| Angina pectoris                         | 109 (43)                         | 340 (40)                                | 37 (34)                                | 115 (32)                                |
| Atrial fibrillation                     | 89 (35)                          | 183 (22)                                | 33 (30)                                | 66 (18)                                 |
| Bradycardia                             | 5 (2)                            | 14 (2)                                  | 2 (2)                                  | 3 (< 1)                                 |
| Heart failure                           | 151 (60)                         | 507 (60)                                | 55 (50)                                | 181 (50)                                |
| Hypertension                            | 225 (89)                         | 749 (89)                                | 95 (86)                                | 331 (91)                                |
| Myocardial infarction                   | 39 (15)                          | 77 (9)                                  | 13 (12)                                | 24 (7)                                  |
| Stroke                                  | 82 (32)                          | 279 (33)                                | 26 (24)                                | 101 (28)                                |
| Other cardiovascular disease            | 132 (52)                         | 428 (51)                                | 46 (42)                                | 140 (38)                                |
| Anaemia                                 | 97 (38)                          | 287 (34)                                | 40 (36)                                | 117 (32)                                |

|                                                   |                  |                  |                  |                  |
|---------------------------------------------------|------------------|------------------|------------------|------------------|
| Hyperkalaemia                                     | 29 (11)          | 69 (8)           | 12 (11)          | 29 (8)           |
| Type 2 diabetes                                   | 125 (49)         | 414 (49)         | n/a              | n/a              |
| Medications, n (%)                                |                  |                  |                  |                  |
| RASis                                             | 174 (69)         | 586 (69)         | 80 (73)          | 258 (71)         |
| ARNIs                                             | 12 (5)           | 13 (2)           | 1 (<1)           | 3 (<1)           |
| β-blockers                                        | 110 (43)         | 256 (30)         | 46 (42)          | 98 (27)          |
| Calcium channel blockers                          | 99 (39)          | 390 (46)         | 39 (35)          | 167 (46)         |
| Diuretics                                         | 112 (44)         | 259 (31)         | 46 (42)          | 99 (27)          |
| Antithrombotic agents                             | 77 (30)          | 235 (28)         | 23 (21)          | 78 (21)          |
| Statins                                           | 127 (50)         | 389 (46)         | 46 (42)          | 138 (38)         |
| Antihyperkalaemic treatments                      | 16 (6)           | 43 (5)           | 7 (6)            | 17 (5)           |
| Antidiabetic treatments                           | 79 (31)          | 338 (40)         | n/a              | n/a              |
| Other medications <sup>a</sup>                    | 87 (34)          | 412 (49)         | 37 (34)          | 172 (47)         |
| eGFR available, n (%)                             | 253 (100)        | 843 (100)        | 110 (100)        | 365 (100)        |
| eGFR, mL/min/1.73 m <sup>2</sup> , mean (SD)      | 59.9 (23.4)      | 70.2 (22.9)      | 56.6 (22.4)      | 67.7 (23.2)      |
| eGFR, mL/min/1.73 m <sup>2</sup> , median (IQR)   | 55.6 (41.1-72.7) | 68.1 (51.5-90.1) | 52.5 (39.1-66.1) | 63.4 (48.4-88.0) |
| eGFR category, mL/min/1.73 m <sup>2</sup> , n (%) |                  |                  |                  |                  |
| ≥60                                               | 102 (40)         | 511 (61)         | 39 (35)          | 197 (54)         |
| 45-59                                             | 79 (31)          | 190 (23)         | 36 (33)          | 101 (28)         |
| 30-44                                             | 61 (24)          | 131 (16)         | 30 (27)          | 63 (17)          |
| 15-29                                             | 11 (4)           | 11 (1)           | 5 (5)            | 4 (1)            |
| UACR available, n (%)                             | 253 (100)        | 846 (100)        | 110 (100)        | 365 (100)        |
| UACR, mg/g, mean (SD)                             | 32.9 (55.3)      | 47.0 (54.8)      | 18.8 (38.7)      | 37.4 (47.2)      |
| UACR, mg/g, median (IQR)                          | 5.6 (1.5-47.8)   | 29.4 (5.8-69.4)  | 1.8 (1.3-5.8)    | 17.3 (1.7-51.7)  |
| UACR category, mg/g, n (%)                        |                  |                  |                  |                  |
| 0-29                                              | 173 (68)         | 449 (53)         | 89 (81)          | 226 (62)         |
| 30-200                                            | 80 (32)          | 397 (47)         | 21 (19)          | 139 (38)         |

|                                                      |          |          |           |           |
|------------------------------------------------------|----------|----------|-----------|-----------|
| With UACR/UPCR measure and no type 2 diabetes, n (%) |          |          |           |           |
| UACR                                                 | 110 (43) | 385 (46) | 110 (100) | 365 (100) |
| UPCR                                                 | 96 (52)  | 319 (59) | 96 (87)   | 302 (83)  |
| Healthcare provider, n (%)                           | 246 (97) | 793 (94) | 109 (99)  | 322 (91)  |
| Primary care                                         | 51 (21)  | 245 (31) | 16 (15)   | 102 (31)  |
| Other                                                | 195 (79) | 548 (69) | 93 (85)   | 230 (69)  |

<sup>a</sup>Calcium, magnesium, nonsteroidal anti-inflammatory drugs, systemic corticosteroids, or vitamin D

*ARNI* angiotensin-receptor neprilysin inhibitor, *BMI* body mass index, *CKD* chronic kidney disease, *eGFR* estimated glomerular filtration rate, *IQR* interquartile range, *n/a* not applicable, *RASi* renin-angiotensin system inhibitor, *SD* standard deviation, *UACR* urinary albumin-creatinine ratio, *UPCR* urinary protein-creatinine ratio



**Table S4** Effectiveness analysis: complete baseline characteristics of the propensity score matched cohort (US and Japan combined)

|                                         | UACR < 200 mg/g               |                                      |                  | UACR < 200 mg/g AND no type 2 diabetes |                                      |                  |
|-----------------------------------------|-------------------------------|--------------------------------------|------------------|----------------------------------------|--------------------------------------|------------------|
|                                         | Initiated dapagliflozin 10 mg | Did not initiate dapagliflozin 10 mg | SMD <sup>a</sup> | Initiated dapagliflozin 10 mg          | Did not initiate dapagliflozin 10 mg | SMD <sup>a</sup> |
| Number of patients                      | 2,972                         | 2,972                                |                  | 275                                    | 275                                  |                  |
| Female, n (%)                           | 1,296 (44)                    | 1,305 (44)                           | 0.0061           | 107 (39)                               | 107 (39)                             | <0.0001          |
| Age, years, median (IQR)                | 74 (69-79)                    | 73 (69-78)                           | 0.0222           | 75 (68-81)                             | 76 (69-81)                           | 0.0479           |
| Race, n (%)                             |                               |                                      | 0.0319           |                                        |                                      | 0.08             |
| Asian                                   | 379 (13)                      | 387 (13)                             |                  | 100 (36)                               | 99 (36)                              |                  |
| Black                                   | 404 (14)                      | 424 (14)                             |                  | 29 (11)                                | 33 (12)                              |                  |
| Hispanic                                | 639 (22)                      | 605 (20)                             |                  | 33 (12)                                | 30 (11)                              |                  |
| White                                   | 1,404 (47)                    | 1,410 (47)                           |                  | 104 (38)                               | 101 (37)                             |                  |
| Other/unknown                           | 146 (5)                       | 146 (5)                              |                  | 9 (3)                                  | 12 (4)                               |                  |
| Insurance type, n (%)                   |                               |                                      | 0.0067           |                                        |                                      | 0.0861           |
| Commercial                              | 103 (3)                       | 104 (4)                              |                  | 6 (2)                                  | < 5 <sup>b</sup>                     |                  |
| Medicare                                | 2,642 (89)                    | 2,636 (89)                           |                  | 174 (63)                               | 176 (64)                             |                  |
| Unknown (Japan)                         | 227 (8)                       | 232 (8)                              |                  | 95 (35)                                | 96 (35)                              |                  |
| Country, n (%)                          |                               |                                      | 0.0063           |                                        |                                      | 0.0076           |
| Japan                                   | 227 (8)                       | 232 (8)                              |                  | 95 (35)                                | 96 (35)                              |                  |
| US                                      | 2,745 (92)                    | 2,740 (92)                           |                  | 180 (65)                               | 179 (65)                             |                  |
| BMI available, n (%)                    | 1,071 (36)                    | 939 (32)                             |                  | 85 (31)                                | 100 (36)                             |                  |
| BMI, kg/m <sup>2</sup> , mean (SD)      | 31.5 (7.0)                    | 31.0 (7.1)                           | 0.0669           | 27.4 (6)                               | 27.5 (6.4)                           | 0.0313           |
| BMI category, kg/m <sup>2</sup> , n (%) |                               |                                      |                  |                                        |                                      |                  |
| 0–18.4                                  | < 5 <sup>b</sup>              | 5 (1)                                |                  | < 5 <sup>b</sup>                       | < 5 <sup>b</sup>                     |                  |
| 18.5–24.9                               | 178 (17)                      | 191 (20)                             |                  | 26 (31)                                | 33 (33)                              |                  |
| 25.0–29.9                               | 318 (30)                      | 257 (27)                             |                  | 36 (42)                                | 40 (40)                              |                  |
| ≥ 30                                    | 571 (53)                      | 486 (52)                             |                  | 20 (24)                                | 25 (25)                              |                  |
| CKD aetiology, n (%)                    |                               |                                      |                  |                                        |                                      |                  |
| Diabetic                                | 1,794 (60)                    | 1,828 (62)                           | 0.0234           | n/a                                    | n/a                                  |                  |
| Hypertensive                            | 1,535 (52)                    | 1,529 (51)                           | 0.004            | 131 (48)                               | 126 (46)                             | 0.0364           |

|                                                 |                  |                  |         |                  |                  |        |
|-------------------------------------------------|------------------|------------------|---------|------------------|------------------|--------|
| Glomerular disease                              | 821 (28)         | 794 (27)         | 0.0204  | 85 (31)          | 87 (32)          | 0.0157 |
| Renal tubulo-interstitial disease               | 452 (15)         | 494 (17)         | 0.0386  | 47 (17)          | 46 (17)          | 0.0097 |
| Comorbidities, n (%)                            |                  |                  |         |                  |                  |        |
| Angina pectoris                                 | 637 (21)         | 642 (22)         | 0.0041  | 68 (25)          | 77 (28)          | 0.0742 |
| Atrial fibrillation                             | 802 (27)         | 797 (27)         | 0.0038  | 99 (36)          | 107 (39)         | 0.0600 |
| Bradycardia                                     | 439 (15)         | 439 (15)         | <0.0001 | 46 (17)          | 48 (17)          | 0.0193 |
| Heart failure                                   | 1,278 (43)       | 1,232 (41)       | 0.0313  | 148 (54)         | 155 (56)         | 0.0511 |
| Hypertension                                    | 2,890 (97)       | 2,885 (97)       | 0.0101  | 259 (94)         | 262 (95)         | 0.0487 |
| Myocardial infarction                           | 391 (13)         | 368 (12)         | 0.0232  | 29 (11)          | 32 (12)          | 0.0347 |
| Stroke                                          | 942 (32)         | 892 (30)         | 0.0364  | 76 (28)          | 88 (32)          | 0.0953 |
| Other cardiovascular disease                    | 2,117 (71)       | 2,120 (71)       | 0.0022  | 181 (66)         | 185 (67)         | 0.0308 |
| Anaemia                                         | 1,602 (54)       | 1,582 (53)       | 0.0135  | 135 (49)         | 133 (48)         | 0.0145 |
| Hyperkalaemia                                   | 549 (18)         | 550 (19)         | 0.0009  | 50 (18)          | 52 (19)          | 0.0187 |
| Type 2 diabetes                                 | 2,658 (89)       | 2,667 (90)       | 0.0099  | n/a              | n/a              |        |
| Medications, n (%)                              |                  |                  |         |                  |                  |        |
| RASis                                           | 2,521 (85)       | 2,503 (84)       | 0.0258  | 217 (79)         | 225 (82)         | 0.0731 |
| ARNIs                                           | 304 (10)         | 260 (9)          | 0.011   | 32 (12)          | 25 (9)           | 0.0834 |
| β-blockers                                      | 1,759 (59)       | 1,671 (56)       | 0.0186  | 172 (63)         | 163 (59)         | 0.067  |
| Calcium channel blockers                        | 1,269 (43)       | 1,249 (42)       | 0.0027  | 124 (45)         | 123 (45)         | 0.0073 |
| Diuretics                                       | 1,503 (51)       | 1,377 (46)       | 0.0143  | 159 (58)         | 155 (56)         | 0.0293 |
| Antithrombotic agents                           | 620 (21)         | 591 (20)         | 0.0027  | 54 (20)          | 58 (21)          | 0.0361 |
| Statins                                         | 2,536 (85)       | 2,452 (83)       | 0.0138  | 173 (63)         | 174 (63)         | 0.0075 |
| Antihyperkalaemic treatments                    | 57 (2)           | 47 (2)           | 0.0154  | 7 (3)            | 6 (2)            | 0.0239 |
| Antidiabetic treatments                         | 2,333 (79)       | 2,283 (77)       | 0.0395  | n/a              | n/a              |        |
| Other medications <sup>c</sup>                  | 1,506 (51)       | 1,461 (49)       | 0.0046  | 131 (48)         | 125 (45)         | 0.0437 |
| eGFR available, n (%)                           | 2,972 (100)      | 2,972 (100)      |         | 275 (100)        | 275 (100)        |        |
| eGFR, mL/min/1.73 m <sup>2</sup> , mean (SD)    | 57.9 (19.7)      | 57.7 (19.1)      | 0.0133  | 52.8 (18)        | 52.6 (19)        | 0.0121 |
| eGFR, mL/min/1.73 m <sup>2</sup> , median (IQR) | 53.7 (42.8-71.1) | 54.8 (43.2-69.1) |         | 50.1 (40.3-60.2) | 49.5 (38.4-61.4) |        |

|                                                         |                 |                 |        |                |                 |        |
|---------------------------------------------------------|-----------------|-----------------|--------|----------------|-----------------|--------|
| eGFR category,<br>mL/min/1.73 m <sup>2</sup> , n (%)    |                 |                 |        |                |                 |        |
| ≥ 60                                                    | 1,154 (39)      | 1,169 (39)      |        | 71 (26)        | 76 (28)         |        |
| 45–59                                                   | 936 (31)        | 946 (32)        |        | 103 (37)       | 89 (32)         |        |
| 30–44                                                   | 798 (27)        | 735 (25)        |        | 93 (34)        | 92 (33)         |        |
| 15–29                                                   | 84 (3)          | 122 (4)         |        | 8 (3)          | 18 (7)          |        |
| UACR available, n (%)                                   | 2,972 (100)     | 2,972 (100)     |        | 275 (100)      | 275 (100)       |        |
| UACR, mg/g, mean (SD)                                   | 39.2 (45.5)     | 39.8 (84.9)     | 0.0092 | 26.8 (41.0)    | 29.1 (38.9)     | 0.0552 |
| UACR, mg/g, median (IQR)                                | 20.1 (7.0-55.8) | 19.0 (7.0-52.0) |        | 8.6 (1.6-32.4) | 14.0 (2.2-39.4) |        |
| UACR category, mg/g, n (%)                              |                 |                 |        |                |                 |        |
| 0–29                                                    | 1,739 (59)      | 1,813 (61)      |        | 202 (73)       | 189 (69)        |        |
| 30–200                                                  | 1,233 (41)      | 1,159 (39)      |        | 73 (27)        | 86 (31)         |        |
| With UACR/UPCR measure and<br>no type 2 diabetes, n (%) |                 |                 |        |                |                 |        |
| UACR                                                    | 285 (10)        | 282 (9)         |        | 275 (100)      | 275 (100)       |        |
| UPCR                                                    | 186 (19)        | 181 (21)        |        | 182 (66)       | 167 (61)        |        |
| Healthcare provider, n (%)                              | 2,968 (100)     | 2,961 (100)     | 0.0136 | 275 (100)      | 267 (97)        | 0.0075 |
| Primary care                                            | 1,716 (58)      | 1,736 (59)      |        | 106 (39)       | 107 (40)        |        |
| Other                                                   | 1,252 (42)      | 1,225 (41)      |        | 169 (61)       | 160 (60)        |        |

<sup>a</sup>An SMD of <0.1 was considered good balance between covariates.

<sup>b</sup>Exact n numbers for pooled cohorts with n < 5 not shown in accordance with Clinformatics Data Mart patient privacy guidelines.

<sup>c</sup>Calcium, magnesium, nonsteroidal anti-inflammatory drugs, systemic corticosteroids or vitamin D

ARNI angiotensin-receptor neprilysin inhibitor, BMI body mass index, CKD chronic kidney disease, eGFR estimated glomerular filtration rate, IQR interquartile range, n/a not applicable, RASi renin-angiotensin system inhibitor, SD standard deviation, UACR urinary albumin-creatinine ratio, UPCR urinary protein-creatinine ratio

**Table S5** List of ICD-10 diagnosis codes used to define CKD.

| <b>Description</b>                       | <b>ICD-10</b>                                    |
|------------------------------------------|--------------------------------------------------|
| <b>CKD</b>                               | N18                                              |
| <b>Renal tubulo-interstitial disease</b> | N10–N16                                          |
| <b>End-stage renal disease</b>           | T86.1, Z49, Z94.0, Z99.2                         |
| <b>Acute renal failure</b>               | N17                                              |
| <b>Hypertensive CKD</b>                  | I12, I13                                         |
| <b>Diabetic CKD</b>                      | E08.2, E11.2                                     |
| <b>Glomerular disease</b>                | N00, N01, N02, N03, N04, N05, N06, N07, N08, R80 |
| <b>CKD unspecified</b>                   | N19, N25, N26, N99.0, Q60, Q62, Q63              |

All ICD-10 codes used to identify CKD were mapped to ICD-9 codes to identify cases coded using either system.

CKD chronic kidney disease, ICD International Classification of Diseases.
